# Supplementary material for: A comprehensive study of methane/carbon dioxide adsorptive selectivity in different bundle nanotubes
Source: Royal Society of Chemistry journal article supplement (doi:10.1039/c6ra16672e), 2016-01-01
Supplement: c6ra16672e1.pdf [file c6ra16672e1.pdf]

**Table S1:** The selectivity of CO<sub>2</sub> in the different armchair SiC-CNT bundles at 300 K.

| (40,40)             |        | (20,20)             |        | (10,10)             |        |
|---------------------|--------|---------------------|--------|---------------------|--------|
| S(CO <sub>2</sub> ) | P(atm) | S(CO <sub>2</sub> ) | P(atm) | S(CO <sub>2</sub> ) | P(atm) |
| 2.09                | 1      | 2.49                | 1      | 3.16                | 1      |
| 2.12                | 3      | 2.54                | 3      | 3.32                | 3      |
| 2.23                | 5      | 2.61                | 5      | 3.47                | 5      |
| 2.38                | 7      | 2.63                | 7      | 3.52                | 7      |
| 2.59                | 9      | 2.84                | 9      | 3.69                | 9      |
| 2.84                | 10     | 3.12                | 10     | 3.73                | 10     |
| 2.91                | 20     | 3.17                | 20     | 4.2                 | 20     |
| 3.08                | 30     | 3.37                | 30     | 4.7                 | 30     |
| 3.49                | 40     | 3.67                | 40     | 5.01                | 40     |
| 3.69                | 50     | 3.88                | 50     | 5.24                | 50     |
| 3.99                | 60     | 4.19                | 60     | 5.39                | 60     |
| 4.1                 | 70     | 4.31                | 70     | 5.51                | 70     |
| 4.11                | 80     | 4.22                | 80     | 5.68                | 80     |
| 3.97                | 90     | 3.99                | 90     | 5.73                | 90     |
| 3.81                | 100    | 3.89                | 100    | 5.64                | 100    |

**Table S2:** The selectivity of CO<sub>2</sub> in the different armchair CNT bundles at 300 K.

---

| (40,40)             |        | (20,20)             |        | (10,10)             |        |
|---------------------|--------|---------------------|--------|---------------------|--------|
| S(CO <sub>2</sub> ) | P(atm) | S(CO <sub>2</sub> ) | P(atm) | S(CO <sub>2</sub> ) | P(atm) |
| 1.93                | 1      | 2.9                 | 1      | 4.11                | 1      |
| 1.78                | 3      | 2.75                | 3      | 4.85                | 3      |
| 1.85                | 5      | 2.83                | 5      | 5.43                | 5      |
| 1.87                | 7      | 2.85                | 7      | 5.85                | 7      |
| 2.08                | 9      | 3.1                 | 9      | 6.49                | 9      |
| 2.36                | 10     | 3.15                | 10     | 6.73                | 10     |
| 2.41                | 20     | 3.21                | 20     | 7                   | 20     |
| 2.61                | 30     | 3.43                | 30     | 7.32                | 30     |
| 2.91                | 40     | 3.59                | 40     | 7.53                | 40     |
| 3.18                | 50     | 3.87                | 50     | 7.67                | 50     |
| 3.49                | 60     | 4.07                | 60     | 7.77                | 60     |
| 3.61                | 70     | 4.17                | 70     | 7.72                | 70     |
| 3.52                | 80     | 4.01                | 80     | 7.39                | 80     |
| 3.29                | 90     | 3.84                | 90     | 7.04                | 90     |
| 3.04                | 100    | 3.58                | 100    | 6.55                | 100    |

---

**Table S3:** The selectivity of CO<sub>2</sub> in the different CNT and SiC-CNT bundles at 300 K.

---

| CNT<br>(20,0)       |        | CNT<br>(20,20)      |        | SiC-<br>CNT<br>(20,0) |        | SiC-<br>CNT<br>(20,20) |        |
|---------------------|--------|---------------------|--------|-----------------------|--------|------------------------|--------|
| S(CO <sub>2</sub> ) | P(atm) | S(CO <sub>2</sub> ) | P(atm) | S(CO <sub>2</sub> )   | P(atm) | S(CO <sub>2</sub> )    | P(atm) |
| 3.6                 | 1      | 2.9                 | 1      | 2.88                  | 1      | 2.49                   | 1      |
| 4.41                | 3      | 2.75                | 3      | 3.02                  | 3      | 2.54                   | 3      |
| 4.91                | 5      | 2.83                | 5      | 3.16                  | 5      | 2.61                   | 5      |
| 5.29                | 7      | 2.85                | 7      | 3.2                   | 7      | 2.63                   | 7      |
| 5.79                | 9      | 3.1                 | 9      | 3.36                  | 9      | 2.84                   | 9      |
| 6.07                | 10     | 3.15                | 10     | 3.42                  | 10     | 3.12                   | 10     |
| 6.39                | 20     | 3.21                | 20     | 3.79                  | 20     | 3.17                   | 20     |
| 6.69                | 30     | 3.43                | 30     | 4.29                  | 30     | 3.37                   | 30     |
| 6.88                | 40     | 3.59                | 40     | 4.58                  | 40     | 3.67                   | 40     |
| 7.01                | 50     | 3.87                | 50     | 4.78                  | 50     | 3.88                   | 50     |
| 7.1                 | 60     | 4.07                | 60     | 4.94                  | 60     | 4.19                   | 60     |
| 7.07                | 70     | 4.17                | 70     | 5.05                  | 70     | 4.31                   | 70     |
| 6.75                | 80     | 4.01                | 80     | 5.21                  | 80     | 4.22                   | 80     |
| 6.43                | 90     | 3.84                | 90     | 5.19                  | 90     | 3.99                   | 90     |
| 6                   | 100    | 3.58                | 100    | 5.17                  | 100    | 3.89                   | 100    |

---

**Table S4:** The selectivity of CO<sub>2</sub> in the (20,20) CNT bundles at different temperatures.

---

| S(CO <sub>2</sub> ) | 350K   |                     | 320K   |                     | 300K   |                     | 280K   |  |
|---------------------|--------|---------------------|--------|---------------------|--------|---------------------|--------|--|
|                     | P(atm) | S(CO <sub>2</sub> ) | P(atm) | S(CO <sub>2</sub> ) | P(atm) | S(CO <sub>2</sub> ) | P(atm) |  |
| 2.52                | 1      | 2.67                | 1      | 2.9                 | 1      | 3.53                | 1      |  |
| 2.23                | 3      | 2.33                | 3      | 2.75                | 3      | 3.57                | 3      |  |
| 2.21                | 5      | 2.41                | 5      | 2.83                | 5      | 3.65                | 5      |  |
| 2.41                | 7      | 2.58                | 7      | 2.85                | 7      | 3.72                | 7      |  |
| 2.98                | 9      | 3.08                | 9      | 3.1                 | 9      | 3.52                | 9      |  |
| 2.83                | 10     | 2.92                | 10     | 3.15                | 10     | 3.78                | 10     |  |
| 2.85                | 20     | 2.93                | 20     | 3.21                | 20     | 3.89                | 20     |  |
| 3.12                | 30     | 3.2                 | 30     | 3.43                | 30     | 4.06                | 30     |  |
| 3.15                | 40     | 3.22                | 40     | 3.59                | 40     | 4.36                | 40     |  |
| 3.58                | 50     | 3.61                | 50     | 3.87                | 50     | 4.53                | 50     |  |
| 3.61                | 60     | 3.66                | 60     | 4.07                | 60     | 4.88                | 60     |  |
| 3.72                | 70     | 3.71                | 70     | 4.17                | 70     | 5.03                | 70     |  |
| 3.48                | 80     | 3.53                | 80     | 4.01                | 80     | 4.89                | 80     |  |
| 3.44                | 90     | 3.52                | 90     | 3.84                | 90     | 4.56                | 90     |  |
| 3.03                | 100    | 3.1                 | 100    | 3.58                | 100    | 4.46                | 100    |  |

---

**Table S4 (Continued).** The selectivity of CO<sub>2</sub> in the (20,20) SiC-CNT bundles.

---

| S(CO <sub>2</sub> ) | 350K   |                     | 320K   |                     | 300K   |                     | 280K   |  |
|---------------------|--------|---------------------|--------|---------------------|--------|---------------------|--------|--|
|                     | P(atm) | S(CO <sub>2</sub> ) | P(atm) | S(CO <sub>2</sub> ) | P(atm) | S(CO <sub>2</sub> ) | P(atm) |  |
| 1.94                | 1      | 2.05                | 1      | 2.49                | 1      | 3.13                | 1      |  |
| 2                   | 3      | 2.09                | 3      | 2.54                | 3      | 3.22                | 3      |  |
| 2.03                | 5      | 2.13                | 5      | 2.61                | 5      | 3.35                | 5      |  |
| 2.1                 | 7      | 2.24                | 7      | 2.63                | 7      | 3.42                | 7      |  |
| 2.47                | 9      | 2.66                | 9      | 2.84                | 9      | 3.22                | 9      |  |
| 2.79                | 10     | 2.86                | 10     | 3.12                | 10     | 3.58                | 10     |  |
| 2.85                | 20     | 2.94                | 20     | 3.17                | 20     | 3.69                | 20     |  |
| 3.07                | 30     | 3.13                | 30     | 3.37                | 30     | 3.81                | 30     |  |
| 3.39                | 40     | 3.43                | 40     | 3.67                | 40     | 4.11                | 40     |  |
| 3.6                 | 50     | 3.68                | 50     | 3.88                | 50     | 4.28                | 50     |  |
| 3.95                | 60     | 4                   | 60     | 4.19                | 60     | 4.58                | 60     |  |
| 3.99                | 70     | 4.04                | 70     | 4.31                | 70     | 4.78                | 70     |  |
| 3.9                 | 80     | 3.95                | 80     | 4.22                | 80     | 4.69                | 80     |  |
| 3.78                | 90     | 3.82                | 90     | 3.99                | 90     | 4.36                | 90     |  |
| 3.69                | 100    | 3.72                | 100    | 3.89                | 100    | 4.26                | 100    |  |

---
